# Supplementary material for: Cadmium(ii) supramolecular complexes constructed from a phenylbenzoxazole-based ligand: self-assembly, structural features and nonlinear optical properties
Source: Royal Society of Chemistry journal article supplement (doi:10.1039/c6ra16821c), 2016-01-01
Supplement: c6ra16821c1.pdf [file c6ra16821c1.pdf]

## Supporting Information (SI)

### Cadmium (II) supramolecular complexes constructed from phenylbenzoxazole-based ligand: self-assembly, structural features and nonlinear optical properties

Na Zhang<sup>a</sup>, Dan Liu<sup>a</sup>, Huihui Zhang<sup>a</sup>, Jianhua Yu<sup>a</sup>, Zhichao Wu<sup>a</sup>, Qiyong Zhu<sup>b, \*</sup>, Hongping Zhou<sup>a, \*</sup>

<sup>a</sup>College of Chemistry and Chemical Engineering, Anhui University and Key Laboratory of Functional Inorganic Materials Chemistry of Anhui Province, 230601, Hefei, P.R. China

<sup>b</sup>Department of Chemistry, Huainan Normal College, Huainan, 232001 P.R. China

Corresponding author. Fax: +86-551-63861279; Tel: +86-551-63861279

E-mail: [zhpzhp@263.net](mailto:zhpzhp@263.net)

**Table S1:** Selected bond lengths (Å) and angles (°) for complexes **1-4**

**Table S2:** Third-order NLO data for complexes **1** and **3**

**Table S1:** Selected bond lengths (Å) and angles (°) for complexes **1-4**

| <b>C<sub>19</sub>H<sub>15</sub>Cd<sub>2</sub>Cl<sub>2</sub>N<sub>3</sub>O(1)</b>  |           |                                                |            |                                                |             |
|-----------------------------------------------------------------------------------|-----------|------------------------------------------------|------------|------------------------------------------------|-------------|
| Cd(1)-N(3)                                                                        | 2.296(2)  | N(3)-Cd(1)-Cl(1) <sup>#1</sup>                 | 159.40(6)  | Cl(2)-Cd(1)-Cl(2) <sup>#2</sup>                | 85.90(3)    |
| Cd(1)-Cl(1) <sup>#1</sup>                                                         | 2.5260(9) | N(3)-Cd(1)-N(2)                                | 71.12(8)   | N(3)-Cd(1)-Cl(1)                               | 90.42(6)    |
| Cd(1)-N(2)                                                                        | 2.566(2)  | Cl(1) <sup>#1</sup> -Cd(1)-N(2)                | 88.44(6)   | Cl(1) <sup>#1</sup> -Cd(1)-Cl(1)               | 82.26(3)    |
| Cd(1)-Cl(2)                                                                       | 2.5866(9) | N(3)-Cd(1)-Cl(2)                               | 99.47(6)   | N(2)-Cd(1)-Cl(1)                               | 77.10(5)    |
| Cd(1)-Cl(2) <sup>#2</sup>                                                         | 2.6519(8) | Cl(1) <sup>#1</sup> -Cd(1)-Cl(2)               | 100.10(3)  | Cl(2)-Cd(1)-Cl(1)                              | 92.83(3)    |
| Cd(1)-Cl(1)                                                                       | 2.7622(9) | N(2)-Cd(1)-Cl(2)                               | 165.89(5)  | Cl(2) <sup>#2</sup> -Cd(1)-Cl(1)               | 177.47(2)   |
| Cd(1) <sup>#1</sup> -Cl(1)                                                        | 2.5260(9) | N(3)-Cd(1)-Cl(2) <sup>#2</sup>                 | 91.95(6)   | Cd(1) <sup>#1</sup> -Cl(1)-Cd(1)               | 97.74(3)    |
| Cd(1) <sup>#2</sup> -Cl(2)                                                        | 2.6519(8) | Cl(1) <sup>#1</sup> -Cd(1)-Cl(2) <sup>#2</sup> | 95.81(3)   | Cd(1)-Cl(2)-Cd(1) <sup>#2</sup>                | 94.10(3)    |
|                                                                                   |           | N(2)-Cd(1)-Cl(2) <sup>#2</sup>                 | 104.53(5)  |                                                |             |
| <b>C<sub>19</sub>H<sub>15</sub>Cd<sub>2</sub>Br<sub>2</sub>N<sub>3</sub>O (2)</b> |           |                                                |            |                                                |             |
| Cd(1)-Br(1)                                                                       | 2.7080(5) | Cd(1)-Br(1)-Cd(1) <sup>#1</sup>                | 92.422(14) | Br(2)-Cd(1)-Br(1) <sup>#1</sup>                | 98.389(15)  |
| Cd(1) <sup>#1</sup> -Br(1)                                                        | 2.8255(5) | N(3)-Cd(1)-N(2)                                | 71.22(9)   | Br(1)-Cd(1)-Br(1) <sup>#1</sup>                | 87.578(14)  |
| Cd(1)-N(3)                                                                        | 2.292(2)  | N(3)-Cd(1)-Br(2)                               | 160.03(6)  | N(3)-Cd(1)-Br(2) <sup>#2</sup>                 | 87.68(6)    |
| Cd(1)-N(2)                                                                        | 2.567(3)  | N(2)-Cd(1)-Br(2)                               | 88.90(6)   | N(2)-Cd(1)-Br(2) <sup>#2</sup>                 | 79.44(6)    |
| Cd(1)-Br(2)                                                                       | 2.6636(5) | N(3)-Cd(1)-Br(1)                               | 100.08(6)  | Br(2)-Cd(1)-Br(2) <sup>#2</sup>                | 86.796(15)  |
| Cd(1)-Br(1) <sup>#1</sup>                                                         | 2.8255(5) | N(2)-Cd(1)-Br(1)                               | 168.85(6)  | Br(1)-Cd(1)-Br(2) <sup>#2</sup>                | 93.509(14)  |
| Cd(1)-Br(2) <sup>#2</sup>                                                         | 2.9010(5) | Br(2)-Cd(1)-Br(1)                              | 99.400(13) | Br(1) <sup>#1</sup> -Cd(1)-Br(2) <sup>#2</sup> | 174.464(11) |
| Cd(1) <sup>#2</sup> -Br(2)                                                        | 2.9010(5) | N(3)-Cd(1)-Br(1) <sup>#1</sup>                 | 86.78(6)   | Cd(1)-Br(2)-Cd(1) <sup>#2</sup>                | 93.203(15)  |
|                                                                                   |           | N(3)-Cd(1)-Br(1) <sup>#1</sup>                 | 98.64(6)   |                                                |             |

| <b>C<sub>40</sub>H<sub>38</sub>Cd<sub>2</sub>I<sub>4</sub>N<sub>6</sub> (3)</b>                                                                                                                                                             |            |                                |           |                                              |           |
|---------------------------------------------------------------------------------------------------------------------------------------------------------------------------------------------------------------------------------------------|------------|--------------------------------|-----------|----------------------------------------------|-----------|
| I(1)-Cd(1)                                                                                                                                                                                                                                  | 2.7911(12) | Cd(1)-I(1)-Cd(1) <sup>#1</sup> | 90.73(2)  | I(2)-Cd(1)-I(1)                              | 124.42(2) |
| I(1)-Cd(1) <sup>#1</sup>                                                                                                                                                                                                                    | 3.0804(10) | N(3)-Cd(1)-N(2)                | 70.20(10) | N(3)-Cd(1)-I(1) <sup>#1</sup>                | 90.59(8)  |
| Cd(1)-N(3)                                                                                                                                                                                                                                  | 2.316(3)   | N(3)-Cd(1)-I(2)                | 123.15(8) | N(2)-Cd(1)-I(1) <sup>#1</sup>                | 159.86(7) |
| Cd(1)-N(2)                                                                                                                                                                                                                                  | 2.532(3)   | N(2)-Cd(1)-I(2)                | 96.91(8)  | I(2)-Cd(1)-I(1) <sup>#1</sup>                | 98.80(4)  |
| Cd(1)-I(2)                                                                                                                                                                                                                                  | 2.7139(12) | N(3)-Cd(1)-I(1)                | 111.54(9) | I(1)-Cd(1)-I(1) <sup>#1</sup>                | 89.27(2)  |
| Cd(1)-I(1) <sup>#1</sup>                                                                                                                                                                                                                    | 3.0804(10) | N(2)-Cd(1)-I(1)                | 92.20(7)  |                                              |           |
| <b>C<sub>21</sub>H<sub>15</sub>CdN<sub>5</sub>OS<sub>2</sub> (4)</b>                                                                                                                                                                        |            |                                |           |                                              |           |
| Cd(1)-N(4)                                                                                                                                                                                                                                  | 2.300(2)   | S(1)-Cd(1) <sup>#2</sup>       | 2.6434(8) | N(5)-Cd(1)-S(1) <sup>#1</sup>                | 96.34(6)  |
| Cd(1)-N(3)                                                                                                                                                                                                                                  | 2.323(2)   | N(4)-Cd(1)-N(3)                | 93.88(9)  | N(2)-Cd(1)-S(1) <sup>#1</sup>                | 169.64(5) |
| Cd(1)-N(5)                                                                                                                                                                                                                                  | 2.357(3)   | N(4)-Cd(1)-N(5)                | 171.47(8) | N(4)-Cd(1)-S(2) <sup>#2</sup>                | 91.20(8)  |
| Cd(1)-N(2)                                                                                                                                                                                                                                  | 2.537(2)   | N(3)-Cd(1)-N(5)                | 90.14(9)  | N(3)-Cd(1)-S(2) <sup>#2</sup>                | 158.56(5) |
| Cd(1)-S(1) <sup>#1</sup>                                                                                                                                                                                                                    | 2.6434(8)  | N(4)-Cd(1)-N(2)                | 94.15(7)  | N(5)-Cd(1)-S(2) <sup>#4</sup>                | 82.40(8)  |
| Cd(1)-S(2) <sup>#2</sup>                                                                                                                                                                                                                    | 2.6899(13) | N(3)-Cd(1)-N(2)                | 70.04(7)  | N(2)-Cd(1)-S(2) <sup>#2</sup>                | 88.83(5)  |
| S(2)-C(21)                                                                                                                                                                                                                                  | 1.647(3)   | N(5)-Cd(1)-N(2)                | 80.14(7)  | S(1) <sup>#1</sup> -Cd(1)-S(2) <sup>#2</sup> | 100.42(3) |
| S(2)-Cd(1) <sup>#1</sup>                                                                                                                                                                                                                    | 2.6899(13) | N(4)-Cd(1)-S(1) <sup>#1</sup>  | 90.35(6)  | C(21)-S(2)-Cd(1) <sup>#1</sup>               | 91.11(9)  |
| S(1)-C(20)                                                                                                                                                                                                                                  | 1.646(3)   | N(3)-Cd(1)-S(1) <sup>#1</sup>  | 100.37(5) | C(20)-S(1)-Cd(1) <sup>#2</sup>               | 95.61(8)  |
| <sup>a</sup> Symmetry transformations used to generate equivalent atoms: For1: #1 -x, -y+1, -z, #2: -x+1, -y+1, -z; #1<br>For2: -x+1, -y+2, -z, #2 -x, -y+2, -z; For3: #1 -x+1, -y+2, -z+1, For4 #1: x, -y+1/2, z+1/2, #2: x, -y+1/2, z-1/2 |            |                                |           |                                              |           |

**Table S2:** Third-order NLO data for complexes **1** and **3**

| compound                                   | Complex 1              | Complex 3              |
|--------------------------------------------|------------------------|------------------------|
| $\beta$ (cm GW <sup>-1</sup> )             | 0.16                   | 0.13                   |
| $\sigma$ (GW)                              | 6415.55                | 5593.66                |
| $\gamma$ (m <sup>2</sup> W <sup>-1</sup> ) | 2.36×10 <sup>-16</sup> | 3.03×10 <sup>-16</sup> |
| $\chi^{(3)}$ (esu)                         | 5.93×10 <sup>-14</sup> | 5.72×10 <sup>-14</sup> |
